# Supplementary material for: Yb body assembly on the flamenco piRNA precursor transcripts reduces genic piRNA production
Source: PubMed Central journal article supplement — Mol Biol Cell. 2019 Jun 1;30(12):1544–54. doi: 10.1091/mbc.E17-10-0591 (PMC6724695; doi:10.1091/mbc.e17-10-0591), 2019-06-01
Supplement: mbc-30-1544-s001.pdf [file mbc-30-1544-s001.pdf]

# Supplemental Materials

*Molecular Biology of the Cell*

Sokolova et al.

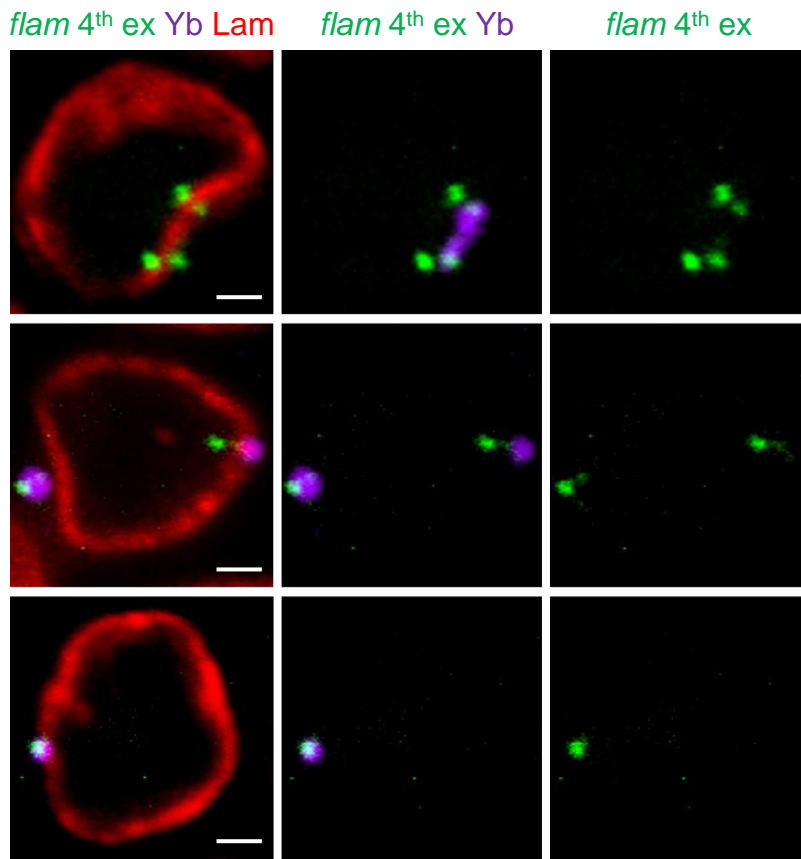

**Figure S1:** *flam* foci are present both in the nucleus and in the cytoplasm of OSCs. RNA FISH with *flam* 4<sup>th</sup> exon probe (green) coupled with the immunostaining of nuclear envelope by anti-lamin Dm0 antibody (red) and of Yb bodies by anti-Yb antibody (violet) on OSCs. FISH signals reside at both sides of the nuclear envelope with the cytoplasmic signals colocalizing with the Yb bodies (upper panel), or passing through nuclear envelope to Yb body (middle panel), or completely colocalizing with Yb body (lower panel). Scale bar 1  $\mu$ m.

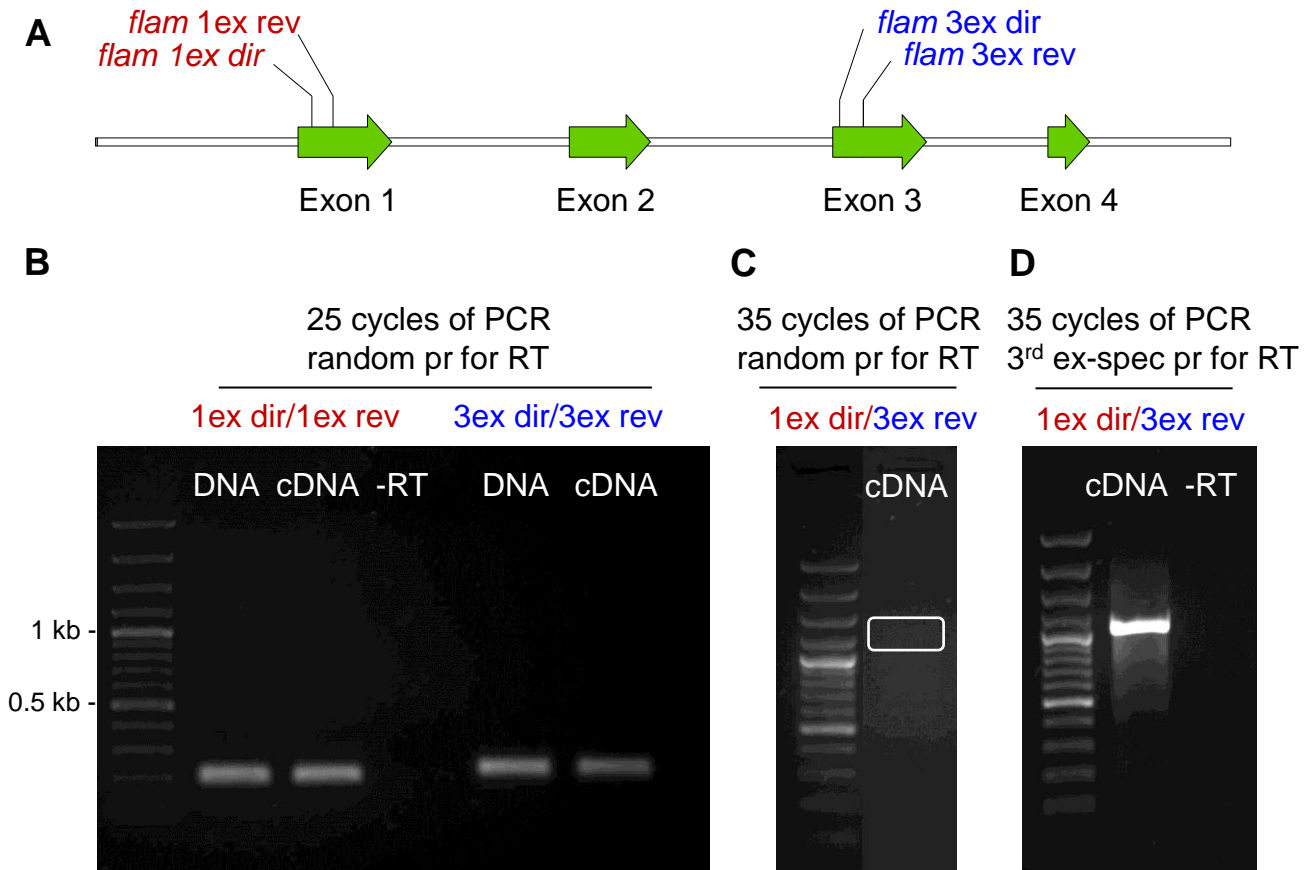

**Figure S2:** *flam* 1<sup>st</sup> and 3<sup>rd</sup> exons are mostly not linked together in the continuous transcripts. (A) Scheme of the 5'-part of *flam* piRNA cluster with the indication of primers used for RT-PCR. (B) After 25 cycles of PCR, *flam* 1<sup>st</sup> and 3<sup>rd</sup> exons are readily detected by the corresponding primer pairs in the ovarian cDNA and genomic DNA. (C, D) After 35 cycles of PCR with the 1<sup>st</sup> exon direct primer and 3<sup>rd</sup> exon reverse primer, *flam* transcript region corresponding to the 1<sup>st</sup> and 3<sup>rd</sup> joint exons is not detected in the ovarian cDNA obtained after RT reaction with the random primer (C), but is detected after RT reaction with the exon-specific primer for the 3<sup>rd</sup> exon (D).

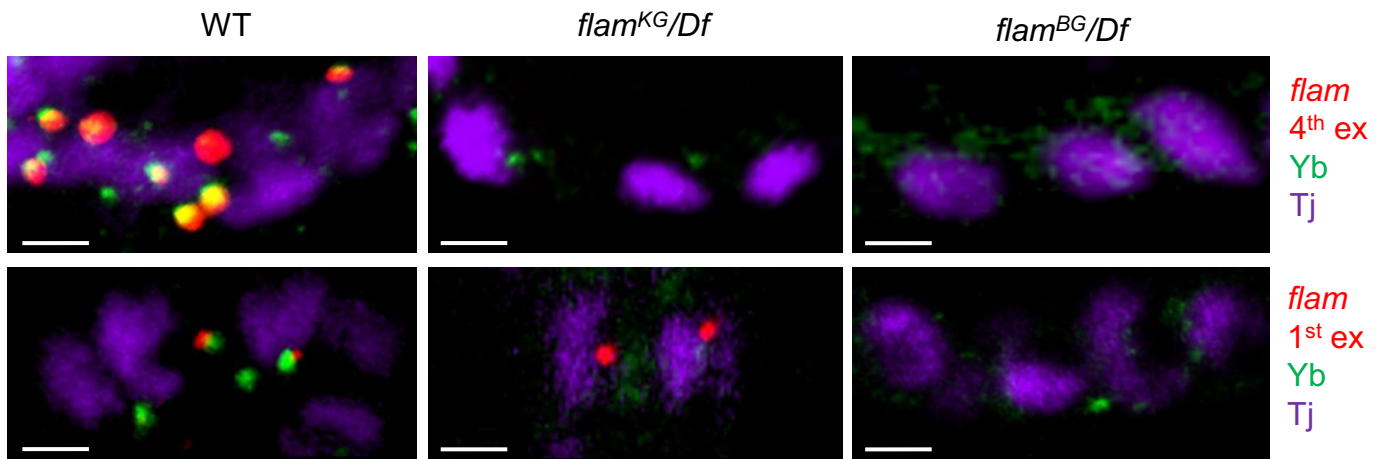

**Figure S3:** *flam* 1<sup>st</sup> exon transcripts are gathered in the foci in *flam*<sup>KG</sup> but not in *flam*<sup>BG</sup> mutants, but Yb bodies are disintegrated in both mutants. Enlarged view of follicle cells in the early egg chambers marked by immunostaining with anti-Tj antibody (the nuclear marker of ovarian somatic cells; violet) after RNA FISH with 4<sup>th</sup> (upper panel) or 1<sup>st</sup> (lower panel) exon probes (red). Yb bodies are marked by anti-Yb antibody (green). Scale bars 3  $\mu$ m.

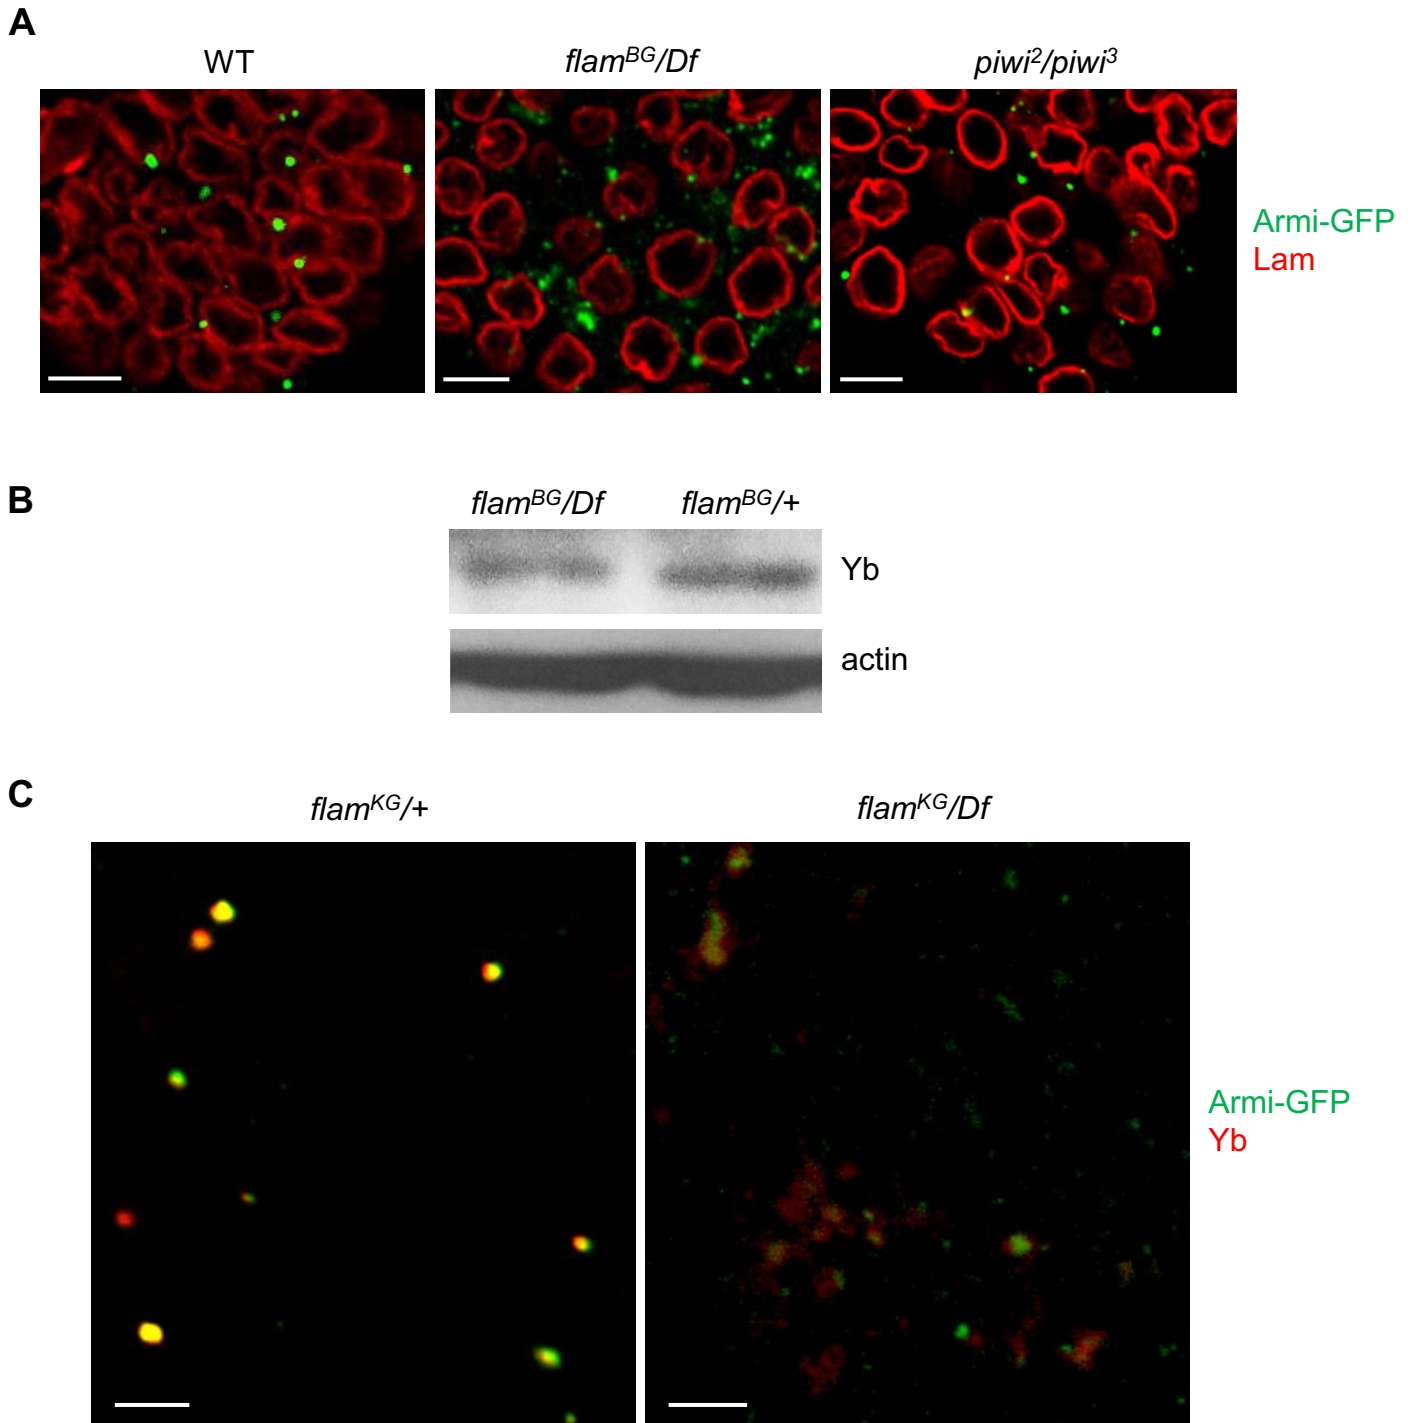

**Figure S4:** Armi and Yb mark the disintegration of Yb bodies in *flam*, but not in *piwi* mutants. (A) Immunostaining of early egg chamber follicle cells with anti-Armi (green) and anti-lamin Dm0 (red) antibodies showing the disintegration of Yb bodies in *flam*<sup>BG</sup> mutant, whereas in *piwi*<sup>2/piwi</sup><sup>3</sup> mutants Yb bodies remain mostly intact. Scale bar 5  $\mu$ m. (B) Western blot probed with anti-Yb and anti-actin (for loading control) antibodies showing that the overall amount of Yb protein remains unchanged in *flam*<sup>BG</sup> mutant ovaries. (C) Immunostaining of control and *flam*<sup>KG</sup> mutant ovaries, expressing Armi-GFP, with anti-Yb antibody showing the colocalization of Armi (green) and Yb (red) in control (left panel) or in a fraction of dispersed aggregates in the *flam* mutant (right panel). Scale bars 3  $\mu$ m.

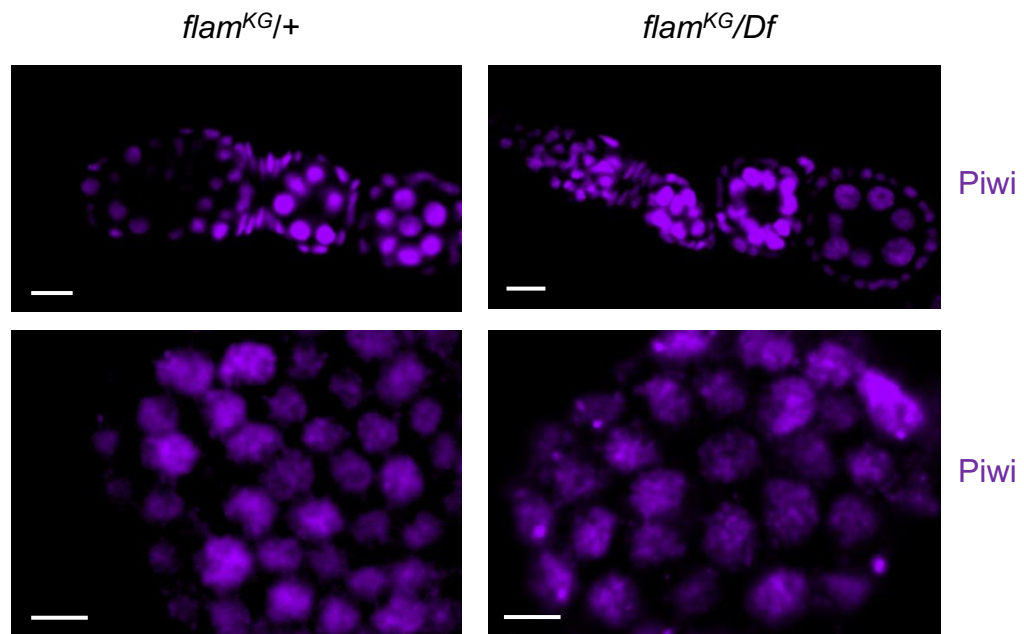

**Figure S5:** Piwi preserves nuclear localization in *flam<sup>KG</sup>* mutant. Immunostaining of *flam<sup>KG/+</sup>* and *flam<sup>KG/Df</sup>* ovarioles (upper panel, scale bar 10  $\mu$ m) and of the surface of early egg chambers (lower panel, scale bar 5  $\mu$ m) with anti-Piwi antibody, showing Piwi localization in the nuclei of follicle cells. More than 20 ovarioles were visually examined.

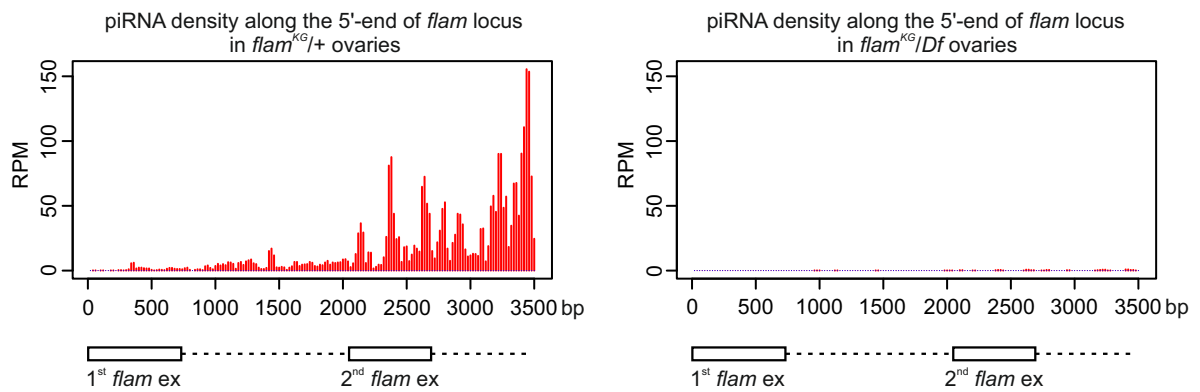

**Figure S6:** piRNA density (in RPM) for uniquely mapped reads along the 5'-end region of *flam* locus in WT and *flam*<sup>KG</sup> mutant ovaries. Sense and antisense piRNAs are indicated in red and blue, respectively. Exon/intron *flam* structure (according to Goriaux *et al.* (2014) and FlyBase r6) is represented below.

*flam* 4<sup>th</sup> ex Yb

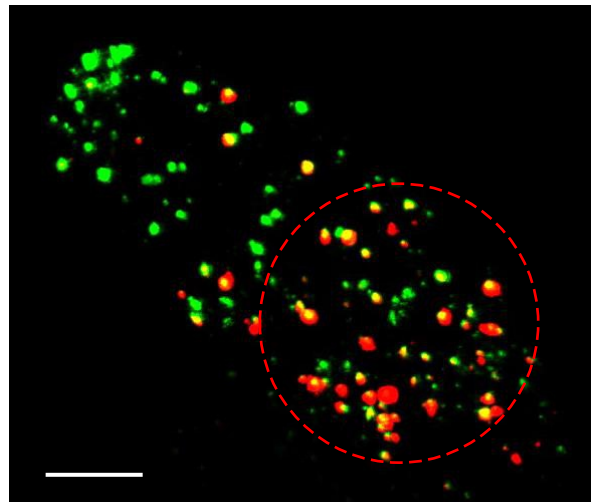

germarium  
(stage 1 is  
outlined)

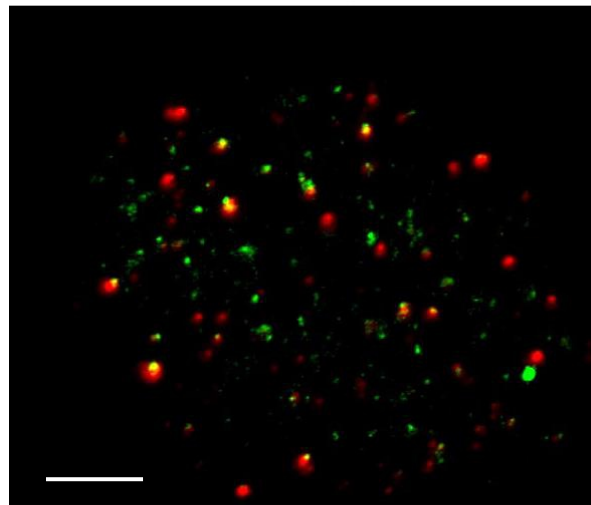

egg chamber  
(stage 4)

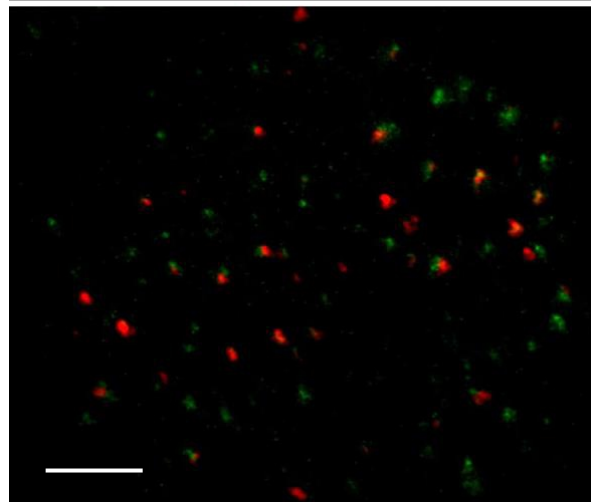

egg chamber  
(stage 6)

**Figure S7:** In ovarian follicle cells *flam* foci as well as the Yb bodies become progressively smaller during egg chamber maturation. The enlarged and signal enhanced version of Figure 5A, right panels. RNA FISH with *flam* 4<sup>th</sup> exon probe (red) coupled with the immunostaining of Yb bodies by anti-Yb antibody (green) in germarium (upper panel, stage 1 egg chamber is outlined by red dotted line), stage 4 egg chamber (middle panel) or stage 6 egg chamber (lower panel) from WT ovariole. Scale bars are 10  $\mu$ m in the upper panel and 7  $\mu$ m in the middle and lower panels.



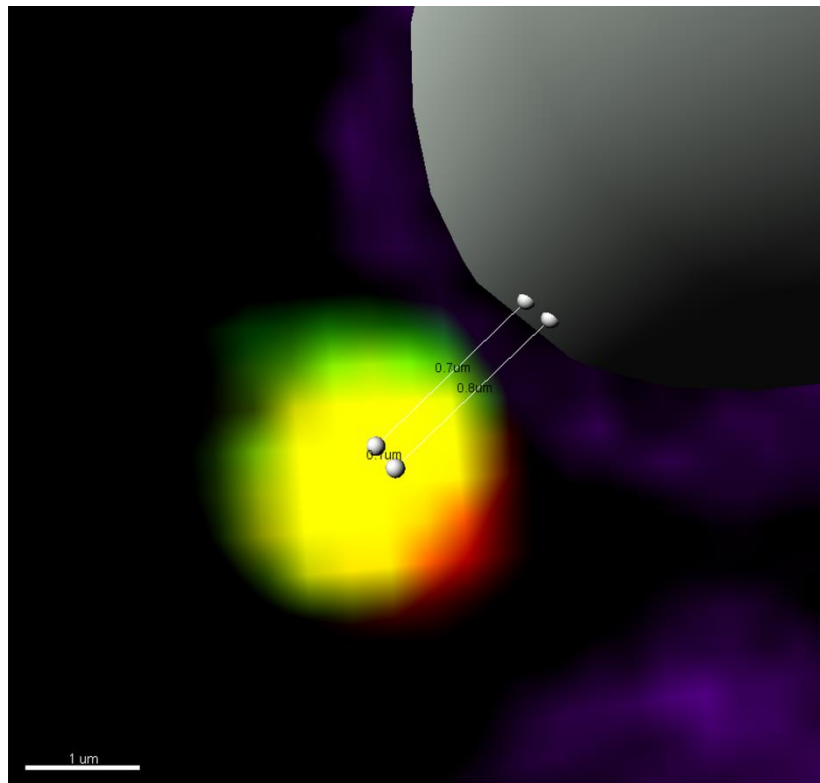

**Figure S8:** Measuring distances between RNA FISH or Yb body signals and nuclear envelope using IMARIS. Shown is the automatically reconstructed by the middle of nuclear lamina (violet) surface of the nucleus (grey). White spheres are the IMARIS “measurement points” positioned on the centers of signals and at the nuclear envelope. White lines connecting the spheres show the distances from nuclear envelope to the Yb body signal (green) and to the *flam* 4<sup>th</sup> exon signal (red) (their overlap results in yellow).

## Supplemental Table S1: Primers used in this study.

### probes for RNA FISH:

|                                           |                                                         |
|-------------------------------------------|---------------------------------------------------------|
| <i>flam</i> 1 <sup>st</sup> ex dir        | 5'-AGTTGCTTTATGACGCCG                                   |
| <i>flam</i> 1 <sup>st</sup> ex rev        | 5'-GAATTAATACGACTCACTATAGGGAGAACAAAATCTTGGGTGACGTAAGT   |
| <i>flam</i> 2 <sup>nd</sup> ex dir        | 5'-TTGTCAAACCAGCCAAGGTATT                               |
| <i>flam</i> 2 <sup>nd</sup> ex rev        | 5'-GAATTAATACGACTCACTATAGGGAGAGGCCAAAACGAGCCCTTACTA     |
| <i>flam</i> 4 <sup>th</sup> ex (#508) dir | 5'-ATTCTCCTTTCTCAGGATGC                                 |
| <i>flam</i> 4 <sup>th</sup> ex (#508) rev | 5'-GAATTAATACGACTCACTATAGGGAGAGCATTGCTACCTTACGTTTC      |
| <i>flam</i> distal ex (#681) dir          | 5'-AGTGCTCAAAGGTTGTCTCAACTCCG                           |
| <i>flam</i> distal ex (#681) rev          | 5'-GAATTAATACGACTCACTATAGGGAGAATGGATTAGGCAGTCTCGTGAAAGC |

### primers for RT-qPCR:

|                                    |                                                           |
|------------------------------------|-----------------------------------------------------------|
| <i>flam</i> 1 <sup>st</sup> ex dir | 5'-GGTATGGACGCAAGAAAAAGGAAT                               |
| <i>flam</i> 1 <sup>st</sup> ex rev | 5'-GAAACAAACAAATTAACCGCAGAAC                              |
| <i>flam</i> 3 <sup>rd</sup> ex dir | 5'-CAGATTACCATTTGGCTATGAGGATCAGAC                         |
| <i>flam</i> 3 <sup>rd</sup> ex rev | 5'-TGGTGAAATACCAAAGTCTTGGGTCAAC                           |
| <i>flam</i> 3 <sup>rd</sup> ex RT  | 5'-GAATTAATACGACTCACTATAGGGAGATGGTGAATACCAAAGTCTTGGGTCAAC |
| <i>adh</i> dir                     | 5'-GCCTGCGTACATAGCCGAGAT                                  |
| <i>adh</i> rev                     | 5'-GCTCCGTTAGTTGTTGGTTTCC                                 |

**Supplemental Table S2:** Counted in IMARIS distances between *flam* RNA FISH and Yb body signals, or between *flam* or Yb body signals and nuclear lamina.

4<sup>th</sup> *flam* exon RNA FISH\_WT\_exp1

| N  | volume of nucleus, mkm <sup>3</sup> | distance between <i>flam</i> RNA FISH signal and nuclear lamina, mkm | distance between Yb body and nuclear lamina, mkm | distance between <i>flam</i> RNA FISH and Yb signals, mkm | "-" inside nucleus, "+" outside nucleus |
|----|-------------------------------------|----------------------------------------------------------------------|--------------------------------------------------|-----------------------------------------------------------|-----------------------------------------|
| 1  | 40                                  | 0,213                                                                | 0,059                                            | 0,131                                                     |                                         |
| 2  | 45                                  | -0,058                                                               | 0,333                                            | 0,406                                                     |                                         |
| 3  | 60                                  | 0,232                                                                | 0,792                                            | 0,619                                                     |                                         |
| 4  | 48                                  | 1,150                                                                | 0,722                                            | 0,428                                                     |                                         |
| 5  | 41                                  | 0,051                                                                | 0,040                                            | 0,185                                                     |                                         |
| 6  | 47                                  | 0,086                                                                | 0,390                                            | 0,395                                                     |                                         |
| 7  | 40                                  | 0,320                                                                | 0,100                                            | 0,361                                                     |                                         |
| 8  | 58                                  | 0,076                                                                | 0,189                                            | 0,157                                                     |                                         |
| 9  | 29                                  | 0,550                                                                | 0,688                                            | 0,696                                                     |                                         |
| 10 | 63                                  | -0,465                                                               | 0,199                                            | 0,658                                                     |                                         |
| 11 | 52                                  | -0,032                                                               | 0,450                                            | 0,698                                                     |                                         |
| 12 | 51                                  | 0,225                                                                | 0,317                                            | 0,277                                                     |                                         |
| 13 | 70                                  | 0,372                                                                | 0,646                                            | 0,295                                                     |                                         |
| 14 | 52                                  | -0,039                                                               | 0,010                                            | 0,338                                                     |                                         |
| 15 | 65                                  | -0,037                                                               | 0,417                                            | 0,455                                                     |                                         |
| 16 | 43                                  | 0,321                                                                | 0,212                                            | 0,153                                                     |                                         |
| 17 | 44                                  | -0,819                                                               | 0,026                                            | 0,928                                                     |                                         |
| 18 | 44                                  | 0,650                                                                | 0,632                                            | 0,208                                                     |                                         |
| 19 | 44                                  | 0,563                                                                | 0,300                                            | 0,312                                                     |                                         |
| 20 | 57                                  | -0,084                                                               | 0,497                                            | 0,657                                                     |                                         |
| 21 | 44                                  | 0,502                                                                | 0,314                                            | 0,272                                                     |                                         |
| 22 | 64                                  | 0,427                                                                | 0,327                                            | 0,326                                                     |                                         |
| 23 | 64                                  | 0,029                                                                | 0,092                                            | 0,267                                                     |                                         |
| 24 | 48                                  | 0,088                                                                | 0,202                                            | 0,475                                                     |                                         |
| 25 | 48                                  | 0,202                                                                | 0,102                                            | 0,281                                                     |                                         |
| 26 | 59                                  | 0,451                                                                | 0,563                                            | 0,291                                                     |                                         |
| 27 | 59                                  | 0,812                                                                | 1,168                                            | 0,383                                                     |                                         |
| 28 | 50                                  | 0,541                                                                | 0,958                                            | 0,466                                                     |                                         |
| 29 | 46                                  | 1,133                                                                | 1,594                                            | 0,593                                                     |                                         |
| 30 | 43                                  | -0,014                                                               | 0,183                                            | 0,179                                                     |                                         |
| 31 | 55                                  | -0,043                                                               | 0,279                                            | 0,379                                                     |                                         |
| 32 | 36                                  | 0,704                                                                | 1,000                                            | 0,327                                                     |                                         |
| 33 | 39                                  | -0,055                                                               | 0,167                                            | 0,733                                                     |                                         |
| 34 | 43                                  | 0,969                                                                | 1,195                                            | 0,424                                                     |                                         |
| 35 | 43                                  | 1,165                                                                | 1,239                                            | 0,183                                                     |                                         |
| 36 | 64                                  | 0,198                                                                | 0,143                                            | 0,510                                                     |                                         |
| 37 | 64                                  | 0,880                                                                | 0,741                                            | 0,246                                                     |                                         |
| 38 | 78                                  | 0,316                                                                | 1,042                                            | 0,786                                                     |                                         |
| 39 | 35                                  | 0,789                                                                | 0,717                                            | 0,302                                                     |                                         |
| 40 | 62                                  | 0,316                                                                | 0,047                                            | 0,297                                                     |                                         |

4<sup>th</sup> *flam* exon RNA FISH\_WT\_exp2

| N  | volume of nucleus, mkm <sup>3</sup> | distance between <i>flam</i> RNA FISH signal and nuclear lamina, mkm | distance between Yb body and nuclear lamina, mkm | distance between <i>flam</i> RNA FISH and Yb signals, mkm | "-" inside nucleus, "+" outside nucleus |
|----|-------------------------------------|----------------------------------------------------------------------|--------------------------------------------------|-----------------------------------------------------------|-----------------------------------------|
| 1  | 45                                  | 0,578                                                                | 0,200                                            | 0,517                                                     |                                         |
| 2  | 45                                  | 0,984                                                                | 0,781                                            | 0,254                                                     |                                         |
| 3  | 57                                  | 0,188                                                                | 0,333                                            | 0,283                                                     |                                         |
| 4  | 89                                  | 0,347                                                                | 0,240                                            | 0,364                                                     |                                         |
| 5  | 54                                  | 0,156                                                                | 0,020                                            | 0,219                                                     |                                         |
| 6  | 56                                  | 0,359                                                                | 0,429                                            | 0,195                                                     |                                         |
| 7  | 85                                  | 0,488                                                                | 0,354                                            | 0,312                                                     |                                         |
| 8  | 64                                  | -0,065                                                               | 0,122                                            | 0,215                                                     |                                         |
| 9  | 68                                  | 0,092                                                                | 0,208                                            | 0,284                                                     |                                         |
| 10 | 40                                  | 0,623                                                                | 0,713                                            | 0,118                                                     |                                         |
| 11 | 87                                  | 0,535                                                                | 0,525                                            | 0,210                                                     |                                         |
| 12 | 92                                  | 0,791                                                                | 0,740                                            | 0,284                                                     |                                         |
| 13 | 92                                  | -0,291                                                               | 0,062                                            | 0,686                                                     |                                         |
| 14 | 58                                  | 0,087                                                                | 0,086                                            | 0,079                                                     |                                         |
| 15 | 60                                  | 0,421                                                                | 0,257                                            | 0,290                                                     |                                         |
| 16 | 71                                  | -0,115                                                               | 0,292                                            | 0,430                                                     |                                         |
| 17 | 72                                  | 0,259                                                                | 0,741                                            | 0,571                                                     |                                         |
| 18 | 72                                  | 1,405                                                                | 1,101                                            | 0,393                                                     |                                         |
| 19 | 85                                  | 0,285                                                                | 0,780                                            | 0,481                                                     |                                         |
| 20 | 75                                  | 0,793                                                                | 0,876                                            | 0,309                                                     |                                         |
| 21 | 38                                  | 0,088                                                                | 0,438                                            | 0,378                                                     |                                         |
| 22 | 35                                  | -0,008                                                               | 0,255                                            | 0,279                                                     |                                         |
| 23 | 34                                  | 0,030                                                                | 0,602                                            | 1,533                                                     |                                         |
| 24 | 78                                  | 0,297                                                                | 0,326                                            | 0,075                                                     |                                         |
| 25 | 78                                  | 0,912                                                                | 0,523                                            | 0,388                                                     |                                         |
| 26 | 40                                  | 0,054                                                                | 0,101                                            | 0,159                                                     |                                         |
| 27 | 67                                  | 0,523                                                                | 0,698                                            | 0,224                                                     |                                         |
| 28 | 57                                  | 0,018                                                                | 0,025                                            | 0,121                                                     |                                         |
| 29 | 57                                  | 0,644                                                                | 0,634                                            | 0,201                                                     |                                         |
| 30 | 78                                  | -0,066                                                               | 0,097                                            | 0,170                                                     |                                         |
| 31 | 78                                  | 0,291                                                                | 0,290                                            | 0,138                                                     |                                         |
| 32 | 88                                  | 0,119                                                                | 0,080                                            | 0,050                                                     |                                         |
| 33 | 88                                  | 0,395                                                                | 0,383                                            | 0,032                                                     |                                         |
| 34 | 77                                  | 1,124                                                                | 0,745                                            | 0,261                                                     |                                         |
| 35 | 106                                 | 0,144                                                                | 0,260                                            | 0,145                                                     |                                         |
| 36 | 106                                 | 0,911                                                                | 0,786                                            | 0,898                                                     |                                         |
| 37 | 82                                  | 0,330                                                                | 0,416                                            | 0,137                                                     |                                         |
| 38 | 96                                  | 0,529                                                                | 0,318                                            | 0,193                                                     |                                         |
| 39 | 96                                  | 0,313                                                                | 0,263                                            | 0,133                                                     |                                         |
| 40 | 70                                  | 0,637                                                                | 0,463                                            | 0,115                                                     |                                         |

1<sup>st</sup> *flam* exon RNA FISH\_WT\_exp1

| N  | volume of nucleus, mkm <sup>3</sup> | distance between <i>flam</i> RNA FISH signal and nuclear lamina, mkm | distance between Yb body and nuclear lamina, mkm | distance between <i>flam</i> RNA FISH and Yb signals, mkm | "-" inside nucleus, "+" outside nucleus |
|----|-------------------------------------|----------------------------------------------------------------------|--------------------------------------------------|-----------------------------------------------------------|-----------------------------------------|
| 1  | 35                                  | 0,133                                                                | 0,616                                            | 0,643                                                     |                                         |
| 2  | 38                                  | 0,106                                                                | 0,572                                            | 0,552                                                     |                                         |
| 3  | 35                                  | -0,753                                                               | 0,032                                            | 0,898                                                     |                                         |
| 4  | 37                                  | 0,201                                                                | 0,338                                            | 0,142                                                     |                                         |
| 5  | 36                                  | 0,019                                                                | 0,034                                            | 1,038                                                     |                                         |
| 6  | 56                                  | -0,055                                                               | 0,019                                            | 0,571                                                     |                                         |
| 7  | 32                                  | 0,476                                                                | 0,688                                            | 1,562                                                     |                                         |
| 8  | 33                                  | 0,005                                                                | 0,110                                            | 0,433                                                     |                                         |
| 9  | 33                                  | 0,183                                                                | 0,097                                            | 0,491                                                     |                                         |
| 10 | 14                                  | -0,375                                                               | 0,643                                            | 1,187                                                     |                                         |
| 11 | 48                                  | 0,515                                                                | 0,757                                            | 0,388                                                     |                                         |
| 12 | 16                                  | -0,086                                                               | 0,660                                            | 2,027                                                     |                                         |
| 13 | 18                                  | 0,095                                                                | 0,232                                            | 0,240                                                     |                                         |
| 14 | 34                                  | -0,580                                                               | 0,256                                            | 1,065                                                     |                                         |
| 15 | 13                                  | -0,194                                                               | 0,094                                            | 0,391                                                     |                                         |
| 16 | 21                                  | 0,383                                                                | 0,876                                            | 0,531                                                     |                                         |
| 17 | 41                                  | -0,281                                                               | 0,019                                            | 0,481                                                     |                                         |
| 18 | 33                                  | 0,135                                                                | 0,709                                            | 1,082                                                     |                                         |
| 19 | 20                                  | -0,243                                                               | 0,090                                            | 0,675                                                     |                                         |
| 20 | 35                                  | 0,164                                                                | 0,095                                            | 0,184                                                     |                                         |
| 21 | 27                                  | 0,144                                                                | 0,543                                            | 0,479                                                     |                                         |
| 22 | 23                                  | -0,035                                                               | 0,196                                            | 0,340                                                     |                                         |
| 23 | 28                                  | 0,342                                                                | 0,482                                            | 0,218                                                     |                                         |
| 24 | 41                                  | -0,166                                                               | 0,423                                            | 0,738                                                     |                                         |
| 25 | 45                                  | -0,202                                                               | 0,039                                            | 0,433                                                     |                                         |
| 26 | 23                                  | 0,159                                                                | 1,267                                            | 1,106                                                     |                                         |
| 27 | 38                                  | -0,012                                                               | 0,493                                            | 0,482                                                     |                                         |
| 28 | 53                                  | -0,371                                                               | 0,072                                            | 0,457                                                     |                                         |
| 29 | 33                                  | -0,045                                                               | 0,018                                            | 0,528                                                     |                                         |
| 30 | 30                                  | 0,364                                                                | 0,069                                            | 0,407                                                     |                                         |
| 31 | 37                                  | -0,133                                                               | 0,300                                            | 0,633                                                     |                                         |
| 32 | 36                                  | 0,450                                                                | 0,758                                            | 0,319                                                     |                                         |
| 33 | 48                                  | -0,181                                                               | 0,285                                            | 0,641                                                     |                                         |
| 34 | 42                                  | -0,449                                                               | 0,001                                            | 0,488                                                     |                                         |
| 35 | 28                                  | 0,680                                                                | 0,721                                            | 0,255                                                     |                                         |
| 36 | 38                                  | 0,587                                                                | 0,789                                            | 0,282                                                     |                                         |
| 37 | 40                                  | 0,330                                                                | 0,670                                            | 0,317                                                     |                                         |
| 38 | 36                                  | 0,329                                                                | 0,114                                            | 1,697                                                     |                                         |
| 39 | 39                                  | 0,090                                                                | 0,290                                            | 0,456                                                     |                                         |
| 40 | 40                                  | 0,365                                                                | 0,255                                            | 0,351                                                     |                                         |

1<sup>st</sup> *flam* exon RNA FISH\_WT\_exp2

| N  | volume of nucleus, mkm <sup>3</sup> | distance between <i>flam</i> RNA FISH signal and nuclear lamina, mkm | distance between Yb body and nuclear lamina, mkm | distance between <i>flam</i> RNA FISH and Yb signals, mkm | "-" inside nucleus, "+" outside nucleus |
|----|-------------------------------------|----------------------------------------------------------------------|--------------------------------------------------|-----------------------------------------------------------|-----------------------------------------|
| 1  | 43                                  | -0,236                                                               | 0,135                                            | 0,390                                                     |                                         |
| 2  | 58                                  | 0,069                                                                | 0,003                                            | 0,087                                                     |                                         |
| 3  | 47                                  | -0,019                                                               | 0,080                                            | 0,364                                                     |                                         |
| 4  | 41                                  | 0,799                                                                | 0,289                                            | 1,042                                                     |                                         |
| 5  | 31                                  | -0,341                                                               | 0,090                                            | 0,488                                                     |                                         |
| 6  | 31                                  | 0,405                                                                | 0,391                                            | 0,550                                                     |                                         |
| 7  | 52                                  | 0,242                                                                | 0,189                                            | 0,265                                                     |                                         |
| 8  | 52                                  | 0,135                                                                | 0,040                                            | 0,130                                                     |                                         |
| 9  | 72                                  | 0,275                                                                | 0,050                                            | 0,472                                                     |                                         |
| 10 | 58                                  | -0,300                                                               | 0,284                                            | 1,025                                                     |                                         |
| 11 | 58                                  | 1,661                                                                | 0,822                                            | 0,756                                                     |                                         |
| 12 | 48                                  | -0,346                                                               | 0,856                                            | 1,266                                                     |                                         |
| 13 | 71                                  | -0,183                                                               | 0,043                                            | 0,582                                                     |                                         |
| 14 | 71                                  | -0,105                                                               | 0,019                                            | 0,134                                                     |                                         |
| 15 | 70                                  | -0,458                                                               | 0,009                                            | 0,682                                                     |                                         |
| 16 | 34                                  | -0,064                                                               | 0,040                                            | 1,078                                                     |                                         |
| 17 | 47                                  | -0,923                                                               | 0,015                                            | 0,946                                                     |                                         |
| 18 | 47                                  | 0,488                                                                | 1,011                                            | 0,554                                                     |                                         |
| 19 | 30                                  | -0,328                                                               | 0,052                                            | 0,550                                                     |                                         |
| 20 | 29                                  | 0,565                                                                | 0,154                                            | 0,532                                                     |                                         |
| 21 | 54                                  | -0,107                                                               | 0,100                                            | 0,239                                                     |                                         |
| 22 | 52                                  | 0,198                                                                | 0,868                                            | 0,588                                                     |                                         |
| 23 | 33                                  | -0,123                                                               | 0,119                                            | 0,434                                                     |                                         |
| 24 | 34                                  | -0,156                                                               | 0,669                                            | 1,159                                                     |                                         |
| 25 | 45                                  | 0,791                                                                | 0,810                                            | 0,815                                                     |                                         |
| 26 | 45                                  | -0,459                                                               | 0,061                                            | 0,592                                                     |                                         |
| 27 | 45                                  | 0,058                                                                | 0,092                                            | 0,253                                                     |                                         |
| 28 | 41                                  | 0,048                                                                | 0,270                                            | 0,207                                                     |                                         |
| 29 | 50                                  | 0,660                                                                | 0,318                                            | 0,321                                                     |                                         |
| 30 | 50                                  | 0,096                                                                | 0,085                                            | 0,747                                                     |                                         |
| 31 | 16                                  | 0,559                                                                | 0,372                                            | 0,189                                                     |                                         |
| 32 | 39                                  | 0,346                                                                | 0,214                                            | 0,416                                                     |                                         |
| 33 | 36                                  | 0,288                                                                | 0,508                                            | 0,356                                                     |                                         |
| 34 | 53                                  | 0,836                                                                | 1,596                                            | 0,596                                                     |                                         |
| 35 | 53                                  | 0,143                                                                | 0,151                                            | 0,056                                                     |                                         |
| 36 | 81                                  | -0,333                                                               | 0,169                                            | 0,494                                                     |                                         |
| 37 | 83                                  | -0,143                                                               | 0,013                                            | 0,235                                                     |                                         |
| 38 | 70                                  | 0,092                                                                | 0,388                                            | 0,608                                                     |                                         |
| 39 | 78                                  | -0,146                                                               | 1,255                                            | 1,225                                                     |                                         |
| 40 | 60                                  | 0,025                                                                | 0,449                                            | 0,426                                                     |                                         |

distal *flam* exon RNA FISH\_WT\_exp1

| N  | volume of nucleus, mkm <sup>3</sup> | distance between <i>flam</i> RNA FISH signal and nuclear lamina, mkm | distance between Yb body and nuclear lamina, mkm | distance between <i>flam</i> RNA FISH and Yb signals, mkm | "-" inside nucleus, "+" outside nucleus |
|----|-------------------------------------|----------------------------------------------------------------------|--------------------------------------------------|-----------------------------------------------------------|-----------------------------------------|
| 1  | 116                                 | 0,537                                                                | 0,511                                            | 0,253                                                     |                                         |
| 2  | 116                                 | 0,847                                                                | 0,752                                            | 0,131                                                     |                                         |
| 3  | 72                                  | 0,218                                                                | 0,294                                            | 0,256                                                     |                                         |
| 4  | 81                                  | 0,059                                                                | 0,101                                            | 0,483                                                     |                                         |
| 5  | 77                                  | 0,845                                                                | 0,634                                            | 0,194                                                     |                                         |
| 6  | 59                                  | 0,326                                                                | 0,228                                            | 0,219                                                     |                                         |
| 7  | 95                                  | 1,029                                                                | 0,716                                            | 1,023                                                     |                                         |
| 8  | 95                                  | 0,483                                                                | 0,710                                            | 0,402                                                     |                                         |
| 9  | 84                                  | 1,446                                                                | 1,262                                            | 0,171                                                     |                                         |
| 10 | 84                                  | 0,735                                                                | 0,925                                            | 0,499                                                     |                                         |
| 11 | 75                                  | 0,087                                                                | 0,031                                            | 0,233                                                     |                                         |
| 12 | 67                                  | 0,135                                                                | 0,517                                            | 0,415                                                     |                                         |
| 13 | 89                                  | 0,472                                                                | 0,610                                            | 0,252                                                     |                                         |
| 14 | 38                                  | 0,334                                                                | 0,265                                            | 0,128                                                     |                                         |
| 15 | 86                                  | 0,842                                                                | 0,498                                            | 0,387                                                     |                                         |
| 16 | 86                                  | 0,262                                                                | 0,335                                            | 0,154                                                     |                                         |
| 17 | 126                                 | 0,087                                                                | 0,252                                            | 0,530                                                     |                                         |
| 18 | 126                                 | 1,295                                                                | 0,308                                            | 0,886                                                     |                                         |
| 19 | 65                                  | -0,132                                                               | 0,308                                            | 0,579                                                     |                                         |
| 20 | 76                                  | 0,479                                                                | 0,600                                            | 0,243                                                     |                                         |
| 21 | 71                                  | 0,220                                                                | 0,274                                            | 0,224                                                     |                                         |
| 22 | 68                                  | 0,749                                                                | 0,690                                            | 0,213                                                     |                                         |
| 23 | 44                                  | 0,276                                                                | 0,161                                            | 0,197                                                     |                                         |
| 24 | 50                                  | 0,521                                                                | 0,415                                            | 0,152                                                     |                                         |
| 25 | 50                                  | 0,785                                                                | 0,525                                            | 0,180                                                     |                                         |
| 26 | 55                                  | 0,587                                                                | 0,011                                            | 0,604                                                     |                                         |
| 27 | 142                                 | 0,383                                                                | 0,700                                            | 0,626                                                     |                                         |
| 28 | 57                                  | -0,568                                                               | 0,019                                            | 0,613                                                     |                                         |
| 29 | 120                                 | -0,048                                                               | 0,054                                            | 0,330                                                     |                                         |
| 30 | 74                                  | 0,328                                                                | 0,896                                            | 0,353                                                     |                                         |
| 31 | 84                                  | 0,096                                                                | 0,148                                            | 0,286                                                     |                                         |
| 32 | 38                                  | 0,145                                                                | 0,398                                            | 0,253                                                     |                                         |
| 33 | 73                                  | 0,206                                                                | 0,139                                            | 0,119                                                     |                                         |
| 34 | 56                                  | 0,448                                                                | 0,363                                            | 0,161                                                     |                                         |
| 35 | 64                                  | 0,590                                                                | 0,525                                            | 0,226                                                     |                                         |
| 36 | 64                                  | 0,972                                                                | 0,313                                            | 0,818                                                     |                                         |
| 37 | 64                                  | 0,558                                                                | 0,607                                            | 0,525                                                     |                                         |
| 38 | 44                                  | 0,262                                                                | 0,758                                            | 0,363                                                     |                                         |
| 39 | 44                                  | 0,708                                                                | 0,929                                            | 0,204                                                     |                                         |
| 40 | 55                                  | 0,126                                                                | 0,046                                            | 0,106                                                     |                                         |

distal *flam* exon RNA FISH\_WT\_exp2

| N  | volume of nucleus, mkm <sup>3</sup> | distance between <i>flam</i> RNA FISH signal and nuclear lamina, mkm | distance between Yb body and nuclear lamina, mkm | distance between <i>flam</i> RNA FISH and Yb signals, mkm | "-" inside nucleus, "+" outside nucleus |
|----|-------------------------------------|----------------------------------------------------------------------|--------------------------------------------------|-----------------------------------------------------------|-----------------------------------------|
| 1  | 69                                  | 0,171                                                                | 0,334                                            | 0,177                                                     |                                         |
| 2  | 16                                  | 1,226                                                                | 0,630                                            | 0,601                                                     |                                         |
| 3  | 40                                  | 0,167                                                                | 0,196                                            | 0,194                                                     |                                         |
| 4  | 40                                  | 0,725                                                                | 0,586                                            | 0,143                                                     |                                         |
| 5  | 73                                  | 0,161                                                                | 0,165                                            | 0,114                                                     |                                         |
| 6  | 73                                  | 0,649                                                                | 0,365                                            | 0,255                                                     |                                         |
| 7  | 68                                  | 0,221                                                                | 0,329                                            | 0,124                                                     |                                         |
| 8  | 68                                  | 0,581                                                                | 0,461                                            | 0,164                                                     |                                         |
| 9  | 46                                  | 1,606                                                                | 1,362                                            | 0,308                                                     |                                         |
| 10 | 46                                  | 0,281                                                                | 0,280                                            | 0,194                                                     |                                         |
| 11 | 55                                  | -0,214                                                               | 0,010                                            | 0,409                                                     |                                         |
| 12 | 41                                  | -0,110                                                               | 0,020                                            | 0,148                                                     |                                         |
| 13 | 67                                  | 0,503                                                                | 0,568                                            | 0,095                                                     |                                         |
| 14 | 67                                  | 0,376                                                                | 0,429                                            | 0,296                                                     |                                         |
| 15 | 49                                  | -0,182                                                               | 0,042                                            | 0,341                                                     |                                         |
| 16 | 55                                  | -0,090                                                               | 0,027                                            | 0,107                                                     |                                         |
| 17 | 89                                  | 0,042                                                                | 0,017                                            | 0,099                                                     |                                         |
| 18 | 87                                  | -0,037                                                               | 0,062                                            | 0,168                                                     |                                         |
| 19 | 87                                  | -0,029                                                               | 0,012                                            | 0,086                                                     |                                         |
| 20 | 87                                  | 0,256                                                                | 0,005                                            | 0,324                                                     |                                         |
| 21 | 84                                  | 0,976                                                                | 0,726                                            | 0,278                                                     |                                         |
| 22 | 91                                  | 0,125                                                                | 0,123                                            | 0,101                                                     |                                         |
| 23 | 91                                  | 0,319                                                                | 0,585                                            | 0,269                                                     |                                         |
| 24 | 53                                  | 0,803                                                                | 0,314                                            | 0,589                                                     |                                         |
| 25 | 67                                  | 0,136                                                                | 0,100                                            | 0,136                                                     |                                         |
| 26 | 62                                  | 0,181                                                                | 0,042                                            | 0,244                                                     |                                         |
| 27 | 62                                  | 0,557                                                                | 0,937                                            | 0,387                                                     |                                         |
| 28 | 32                                  | 0,369                                                                | 0,507                                            | 0,144                                                     |                                         |
| 29 | 88                                  | -0,073                                                               | 0,007                                            | 0,222                                                     |                                         |
| 30 | 67                                  | 0,263                                                                | 0,326                                            | 0,079                                                     |                                         |
| 31 | 52                                  | 0,473                                                                | 0,422                                            | 0,203                                                     |                                         |
| 32 | 64                                  | -0,065                                                               | 0,301                                            | 0,398                                                     |                                         |
| 33 | 50                                  | 0,966                                                                | 0,592                                            | 0,361                                                     |                                         |
| 34 | 57                                  | 0,504                                                                | 0,668                                            | 0,243                                                     |                                         |
| 35 | 66                                  | 0,416                                                                | 0,512                                            | 0,192                                                     |                                         |
| 36 | 66                                  | 0,259                                                                | 0,191                                            | 0,203                                                     |                                         |
| 37 | 61                                  | 0,752                                                                | 0,732                                            | 0,096                                                     |                                         |
| 38 | 55                                  | 0,171                                                                | 0,394                                            | 0,449                                                     |                                         |
| 39 | 55                                  | 0,223                                                                | 0,258                                            | 0,099                                                     |                                         |
| 40 | 68                                  | 0,531                                                                | 0,478                                            | 0,056                                                     |                                         |



1<sup>st</sup> *flam* exon RNA FISH\_ *flam*<sup>KG</sup>\_exp1

| N  | volume of nucleus, mkm <sup>3</sup> | distance between <i>flam</i> RNA FISH signal and nuclear lamina, mkm | "-" inside nucleus, "+" outside nucleus |
|----|-------------------------------------|----------------------------------------------------------------------|-----------------------------------------|
| 1  | 66                                  | -0,195                                                               |                                         |
| 2  | 78                                  | 1,060                                                                |                                         |
| 3  | 76                                  | -0,023                                                               |                                         |
| 4  | 76                                  | -0,849                                                               |                                         |
| 5  | 48                                  | 0,262                                                                |                                         |
| 6  | 48                                  | -0,381                                                               |                                         |
| 7  | 57                                  | -0,711                                                               |                                         |
| 8  | 57                                  | 0,621                                                                |                                         |
| 9  | 43                                  | 0,014                                                                |                                         |
| 10 | 43                                  | -0,079                                                               |                                         |
| 11 | 56                                  | 0,053                                                                |                                         |
| 12 | 41                                  | -0,157                                                               |                                         |
| 13 | 62                                  | 0,359                                                                |                                         |
| 14 | 64                                  | -0,113                                                               |                                         |
| 15 | 64                                  | 0,023                                                                |                                         |
| 16 | 64                                  | 0,258                                                                |                                         |
| 17 | 62                                  | 0,152                                                                |                                         |
| 18 | 52                                  | 0,234                                                                |                                         |
| 19 | 63                                  | 0,609                                                                |                                         |
| 20 | 16                                  | 0,488                                                                |                                         |
| 21 | 16                                  | -0,660                                                               |                                         |
| 22 | 52                                  | 0,047                                                                |                                         |
| 23 | 49                                  | -0,447                                                               |                                         |
| 24 | 59                                  | 0,113                                                                |                                         |
| 25 | 56                                  | -0,153                                                               |                                         |
| 26 | 56                                  | -0,036                                                               |                                         |
| 27 | 80                                  | -0,046                                                               |                                         |
| 28 | 80                                  | 0,216                                                                |                                         |
| 29 | 49                                  | 0,093                                                                |                                         |
| 30 | 47                                  | 0,063                                                                |                                         |
| 31 | 49                                  | 0,041                                                                |                                         |
| 32 | 84                                  | -0,101                                                               |                                         |
| 33 | 84                                  | -0,653                                                               |                                         |
| 34 | 76                                  | 0,243                                                                |                                         |
| 35 | 80                                  | -0,238                                                               |                                         |
| 36 | 80                                  | 0,034                                                                |                                         |
| 37 | 59                                  | 0,068                                                                |                                         |
| 38 | 89                                  | -0,139                                                               |                                         |
| 39 | 89                                  | -0,874                                                               |                                         |
| 40 | 104                                 | 0,058                                                                |                                         |

## Supplemental Data S1.

This Excel file includes data for RPM values of small RNAs uniquely mapped to the 3'-UTRs of genic piRNA clusters, to *flamenco*, to other predominantly germline-specific piRNA clusters, and to the top 10 most abundant in OSCs microRNAs based on the deep sequencing of small RNA libraries prepared from *flam*<sup>K<sup>G</sup>/+</sup> and *flam*<sup>K<sup>G</sup>/Df</sup> ovaries (this work; Sheet #1), or based on the data taken from (Malone *et al.*, 2009; Sheet #2).
